# Supplementary material
Source: HighWire-hosted journal article supplement (https://jnm.snmjournals.org/highwire/filestream/93955/field_highwire_adjunct_files/0/jnm052514_supplemental_figures.pdf)
Supplement: jnm052514_supplemental_figures.pdf [file jnm052514_supplemental_figures.pdf]

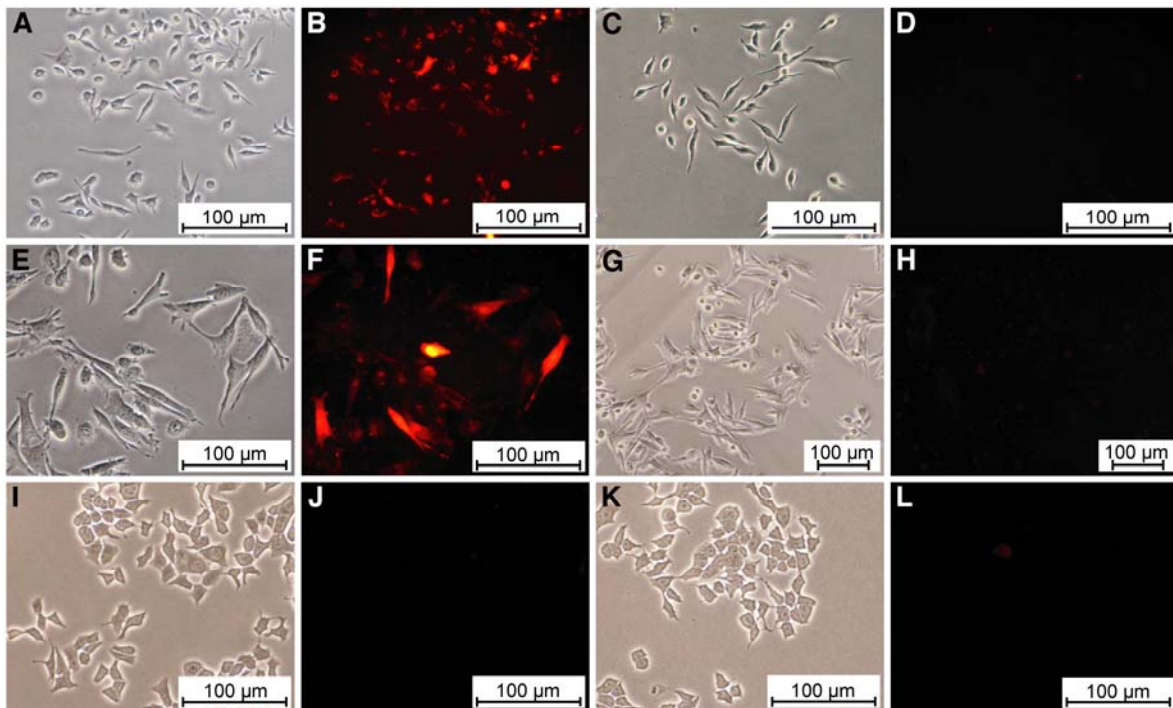

Supplemental Figure 1. Binding affinity of RGD-Cy 5.5 to macrophages and tumor cell lines with different  $\alpha_v\beta_3$  expression levels.

Murine macrophages (RAW 264.7; A-D), highly  $\alpha_v\beta_3$ -positive M21 melanoma (positive control; E-H), and  $\alpha_v\beta_3$  integrin-negative MCF-7 adenocarcinoma cells (negative control; I-L) were incubated with 14  $\mu\text{M}$  RGD-Cy 5.5 to evaluate the target affinity of the probe. A strong cellular  $\alpha_v\beta_3$ -mediated fluorescence could be observed for RAW 264.7 (B; A: phase contrast image) and M21 (F; E: phase contrast image) cells, which could be selectively blocked by predosing with the unlabeled RDG-peptide (D: RAW 264.7, H: M21). MCF-7 cells, which lack  $\alpha_v\beta_3$ -expression, did not bind the targeted fluorochrome (I, K: phase contrast; J, L: fluorescence microscopy). Scale bars are indicated.

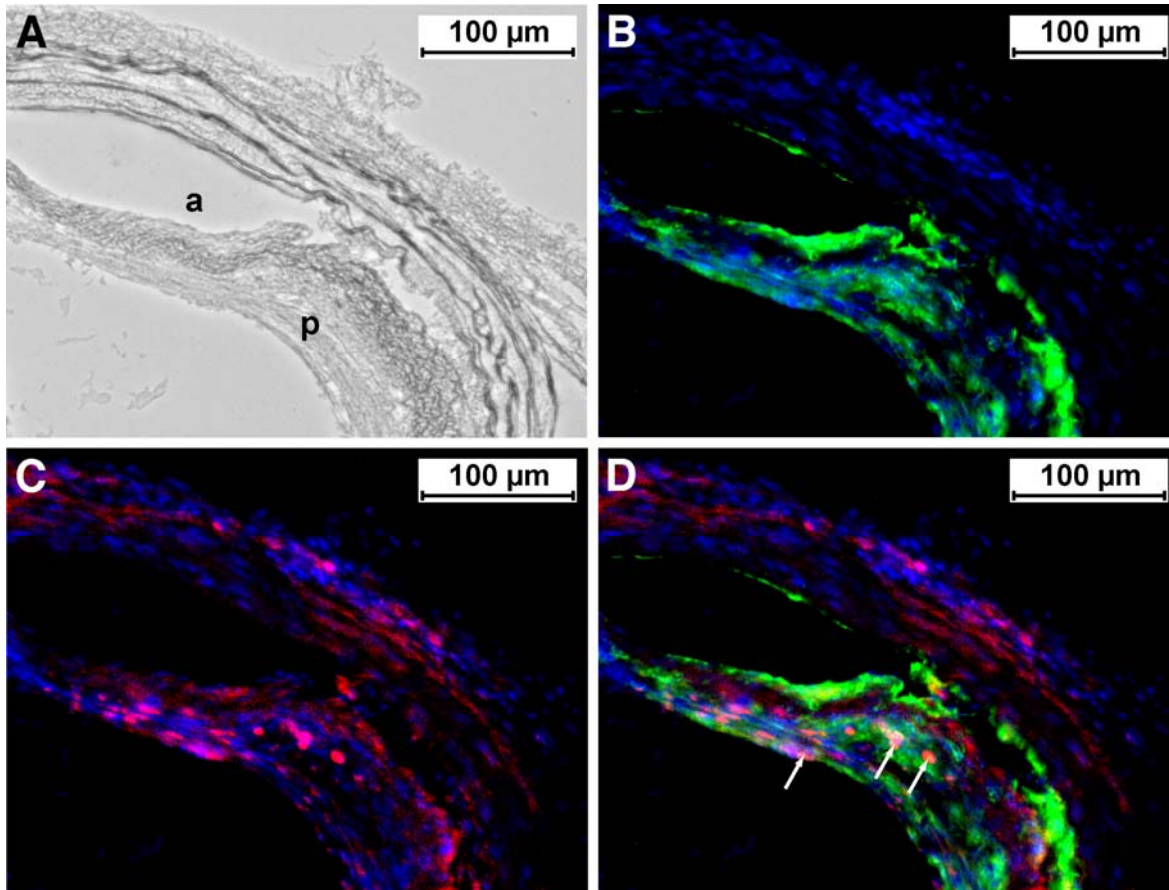

Supplemental Figure 2. Immunohistochemistry in murine atherosclerotic lesions.

Frozen tissue atherosclerotic plaquelike lesion (p) sections from carotid arteries of ApoE<sup>-/-</sup> mice (A, white light) were incubated with CD68 antibody (B, D; green signal), directed against macrophages or RGD-Cy 5.5 (C, D; red signal). Nuclei were counterstained with 4',6-diamidino-2-phenylindole (DAPI; B, C, D; blue signal). Merging the 3 fluorescence stainings (D) visualized macrophage rich areas (white arrows) in the plaquelike lesions (p) that revealed homing/binding of the RGD-Cy 5.5 probe. Note the considerable background signal through binding of RGD-Cy 5.5 to the elastin rich fibers of the medium and the vascular SMCs. Scale bars are indicated.

Fixation artifact of the tissue (a).
